# Supplementary material for: Protection against ulcerative colitis and colorectal cancer by evodiamine via anti-inflammatory effects
Source: PubMed Central journal article supplement — Mol Med Rep. 2022 Mar 29;25(5):188. doi: 10.3892/mmr.2022.12704 (PMC8985202; doi:10.3892/mmr.2022.12704), 2022-03-29

Figure S1. Relationship between the proteins assessed using STRINGdb (n=3).

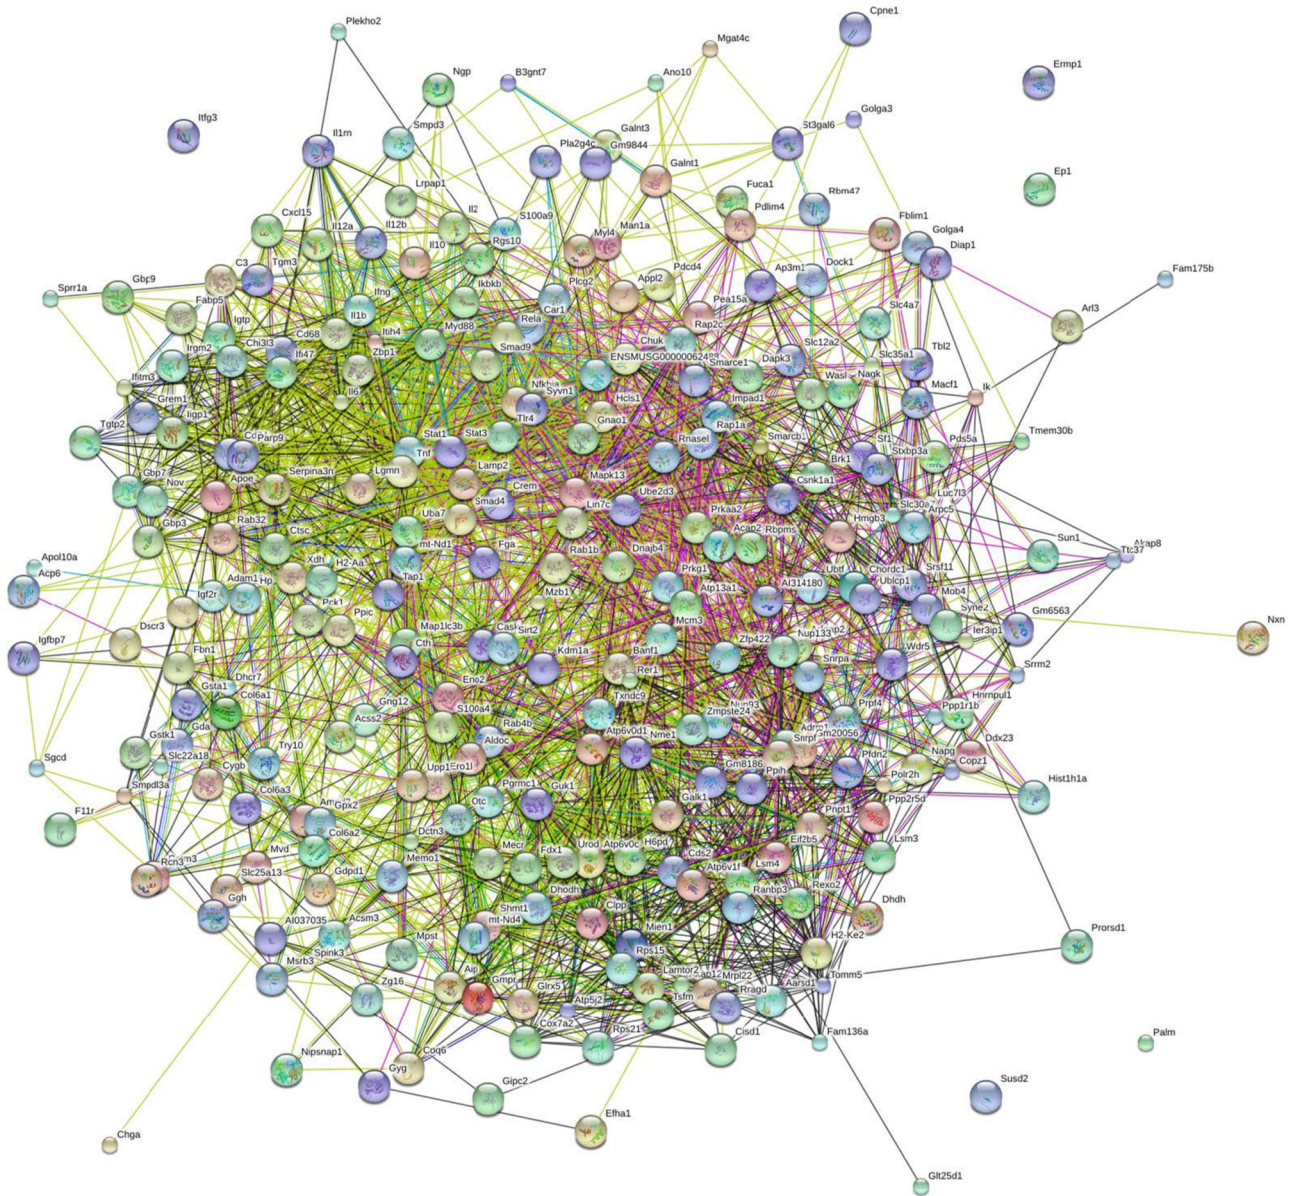

Figure S2. Cytotoxic effects of Evo on SW480 cells. Evo reduced the (A) cell viability, (B) caused cell cycle arrest at the G<sub>2</sub>/M phase, (C) inhibited the MMP (magnification, x100) and (D) suppressed the translation of p-NF-κB from cytoplasm to the nucleus in SW480 cells (magnification, x400). The white arrows point to NF-κB in the nucleus. Data are presented as the mean ± SEM (n=6) and analyzed using a one-way ANOVA test followed by Tukey's test. \*\*P<0.01 and \*\*\*P<0.001 vs. CTRL. Evo, evodiamine; MMP, mitochondrial membrane potential; p-, phosphorylated; CTRL, control.

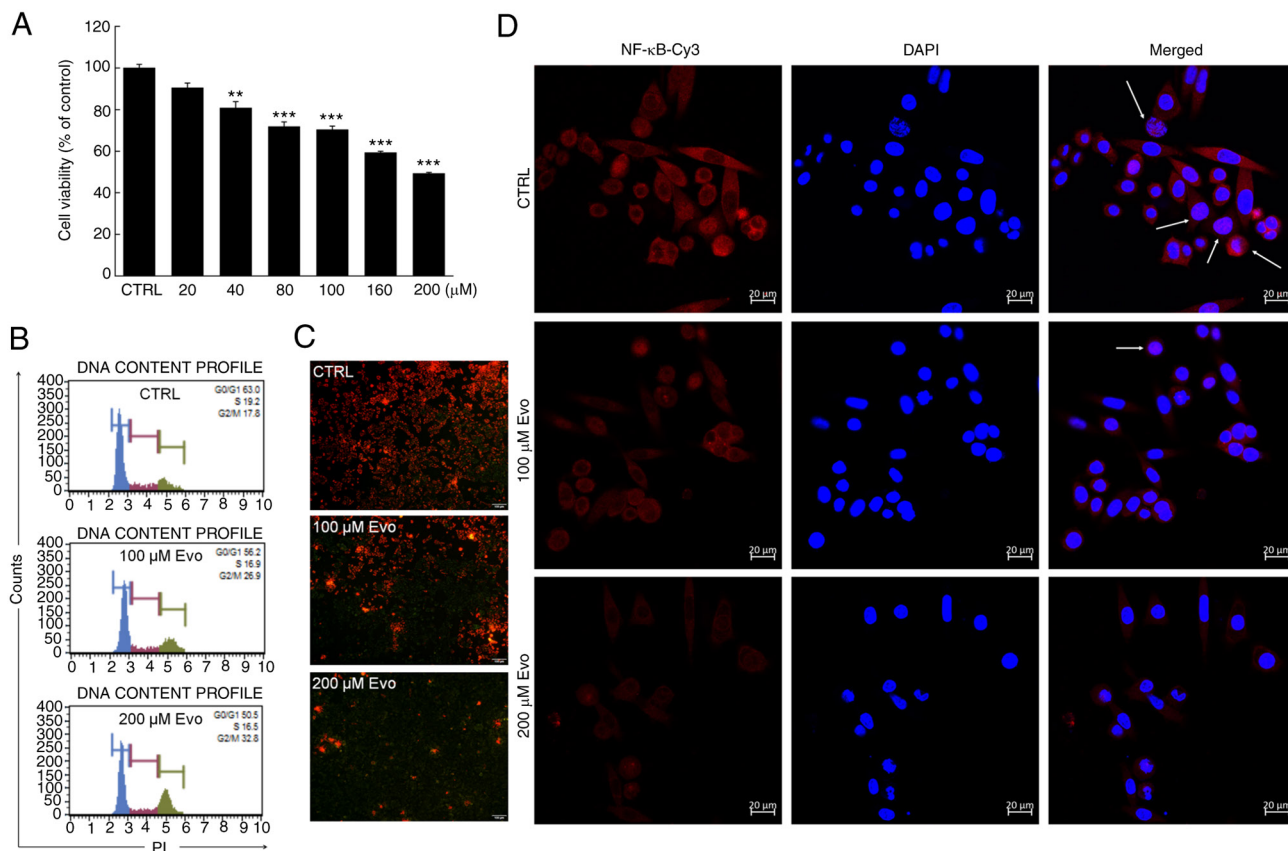

Figure S3. Apoptosis in the colorectal cancer tumor tissues is increased after Evo treatment (n=3). Magnification, x200. Evo, evodiamine.

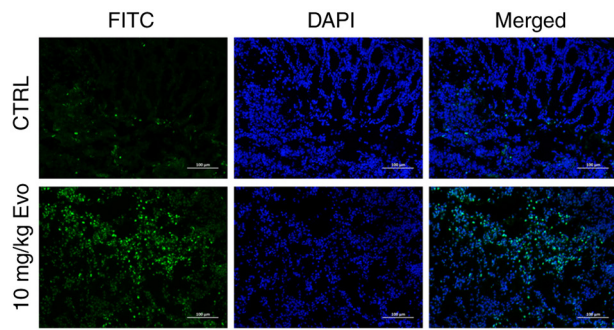

Supplement: Supplementary_Data1.pdf [file Supplementary_Data1.pdf]
