# Supplementary material for: Protection against ulcerative colitis and colorectal cancer by evodiamine via anti-inflammatory effects
Source: PubMed Central journal article supplement — Mol Med Rep. 2022 Mar 29;25(5):188. doi: 10.3892/mmr.2022.12704 (PMC8985202; doi:10.3892/mmr.2022.12704), 2022-03-29
Supplement: Supplementary_Data2.pdf [file Supplementary_Data2.pdf]

Table SI. Effect of Evo on bodyweight and organ indexes of mice with ulcerative colitis.

| Parameter       | CTRL      | 3.0% DSS               |                        |                        |                        |
|-----------------|-----------|------------------------|------------------------|------------------------|------------------------|
|                 |           | DSS only               | SASP<br>(0.6 g/kg)     | Evo (mg/kg)            |                        |
|                 |           |                        |                        | 10                     | 30                     |
| Body weight (g) |           |                        |                        |                        |                        |
| 1st day         | 23.2±0.3  | 23.1±0.3               | 23.1±0.3               | 23.1±0.3               | 23.1±0.3               |
| 6th day         | 24.4±0.2  | 23.2±0.3 <sup>a</sup>  | 23.2±0.3               | 23.2±0.3               | 23.2±0.3               |
| 13th day        | 24.4±0.3  | 20.1±0.7 <sup>b</sup>  | 21.2±0.7               | 20.9±0.7               | 22.6±0.5 <sup>c</sup>  |
| 20st day        | 25.7±0.3  | 22.9±0.5 <sup>b</sup>  | 24.3±0.3 <sup>c</sup>  | 23.8±0.4               | 24.3±0.2 <sup>c</sup>  |
| 27th day        | 26.4±0.4  | 23.8±0.4 <sup>b</sup>  | 24.5±0.4               | 25.0±0.2 <sup>c</sup>  | 25.2±0.2 <sup>c</sup>  |
| Organ index (%) |           |                        |                        |                        |                        |
| Spleen          | 0.28±0.01 | 0.55±0.05 <sup>b</sup> | 0.42±0.02              | 0.37±0.03 <sup>c</sup> | 0.32±0.02 <sup>d</sup> |
| Liver           | 3.81±0.04 | 4.71±0.19 <sup>b</sup> | 4.33±0.06 <sup>c</sup> | 4.18±0.08 <sup>c</sup> | 4.24±0.08 <sup>d</sup> |
| Kidney          | 1.19±0.02 | 1.21±0.03              | 1.25±0.04              | 1.23±0.01              | 1.24±0.02              |

Data were analyzed using one-way ANOVA and expressed as the mean± SEM (n=15). <sup>a</sup>P<0.01 and <sup>b</sup>P<0.001 vs. negative control mice; <sup>\*</sup>P<0.05, <sup>d</sup>P<0.01 and <sup>e</sup>P<0.001 vs. ulcerative colitis mice. DSS, dextran sodium sulfate; CTRL, control; Evo, Evodiamine; SASP, Sulfasalazine.

Table SII. Results of differential-expressed protein in the samples from C57BL/6 mice with UC.

| Gene names          | fc..CRTL--Model | fc..Model--10mg/kg<br>Evo |
|---------------------|-----------------|---------------------------|
| Prorsd1             | 152.5996        | 0.0063708                 |
| Syne2               | 75.80529        | 0.014295                  |
| Banf1               | 75.35449        | 0.0160268                 |
| Rab1b               | 49.27247        | 0.0221919                 |
| Fblim1              | 31.40618        | 0.025196                  |
| Mvd                 | 30.29963        | 0.0293303                 |
| Acss2               | 40.3046         | 0.0296535                 |
| Galk1               | 26.0271         | 0.0306519                 |
| Hint2               | 32.9206         | 0.0349921                 |
| Pds5a               | 48.80501        | 0.0353401                 |
| Parp9               | 28.64078        | 0.0448427                 |
| Gnao1               | 19.88283        | 0.0464415                 |
| Gipc2               | 18.74995        | 0.0467667                 |
| Hmgb3               | 23.10777        | 0.0472241                 |
| Adam10              | 21.04979        | 0.0500377                 |
| Brk1                | 19.48674        | 0.0535466                 |
| 1110005A23Rik;Sarnp | 18.82592        | 0.0567927                 |
| Rap1a;Gm9392        | 18.22762        | 0.0571532                 |
| Csnk1a1             | 12.71221        | 0.0594218                 |
| mt-Nd1;ND1;Mtnd1    | 13.44172        | 0.0603273                 |
| Atp6v0d1            | 15.64175        | 0.060726                  |
| Rexo2               | 19.01863        | 0.0631304                 |
| Aldoc               | 3.371455        | 0.4414354                 |
| Galnt1              | 2.297861        | 0.442859                  |
| Pla2g4c             | 4.240254        | 0.4435096                 |
| Man1a;Man1a1        | 3.437068        | 0.4522245                 |
| B3gnt7              | 4.816294        | 0.4575006                 |
| Sun1                | 2.844046        | 0.4730906                 |
| Acsm3               | 3.700846        | 0.4815987                 |
| Wasl                | 2.089058        | 0.5006134                 |
| Txndc9              | 1.919495        | 0.5063291                 |
| St3gal6             | 2.254318        | 0.5088168                 |
| Mapk13              | 1.525012        | 0.5114787                 |
| Ppp1r1b             | 2.072634        | 0.5147323                 |
| Arpc5               | 2.831206        | 0.5263029                 |
| Gmpr                | 2.112778        | 0.5345966                 |
| Nup93               | 1.833611        | 0.534603                  |
| Cisd1               | 2.119178        | 0.5371058                 |
| Fbn1                | 1.739521        | 0.5452779                 |
| Slc12a2             | 2.030303        | 0.5747239                 |
| Mcm3                | 2.045444        | 0.5773691                 |
| Luc7l3              | 1.798045        | 0.5818891                 |

|                                  |          |           |
|----------------------------------|----------|-----------|
| Ubtf                             | 1.582313 | 0.5826726 |
| Cth                              | 1.760548 | 0.5888283 |
| C3                               | 0.299983 | 1.8464511 |
| Dscr3                            | 0.142625 | 1.8487483 |
| Prpf4                            | 0.497242 | 1.8719389 |
| Apol10a                          | 0.232218 | 1.9058091 |
| Galnt3                           | 0.640088 | 1.9133523 |
| Ifggd1;Igtf                      | 0.448899 | 1.9255557 |
| Plcg2                            | 0.373723 | 1.9777    |
| Ap3m1                            | 0.330426 | 2.0159871 |
| Ca1                              | 0.404706 | 2.0186581 |
| Lgmn                             | 0.068326 | 2.0449824 |
| Uba7                             | 0.162255 | 2.0534785 |
| Smpd13a                          | 0.455853 | 2.0734809 |
| Tap1                             | 0.285409 | 2.1352888 |
| Zfp422;Znf22                     | 0.309703 | 2.1546143 |
| Zg16                             | 0.625707 | 2.1774566 |
| Upp1                             | 0.451596 | 2.1847251 |
| Ifitm3;Ifitm2                    | 0.403743 | 2.1849702 |
| Mob4                             | 0.294867 | 2.2370386 |
| Stxbp3;Stxbp3b                   | 0.248683 | 2.2400488 |
| Dock1                            | 0.448236 | 2.2450349 |
| Gsta1;Gsta2;Gm10639              | 0.216012 | 2.2817858 |
| Rragd;Rragc                      | 0.133791 | 2.3729077 |
| Clpp                             | 15.68761 | 0.0635922 |
| Ggh                              | 49.19446 | 0.0674738 |
| Ranbp3                           | 7.952681 | 0.080494  |
| Ik                               | 13.34166 | 0.0814714 |
| Tbl2                             | 15.06727 | 0.0866417 |
| Susd2                            | 9.07672  | 0.0944565 |
| Pdcd4                            | 12.45718 | 0.1002631 |
| Rps15                            | 13.41727 | 0.1069667 |
| F11r                             | 9.086706 | 0.1096411 |
| Nagk                             | 7.207704 | 0.1124664 |
| Glrx5                            | 8.166407 | 0.11312   |
| Gbp9;Gbp8;Mpa21;Gbp11;Gbp10;Gbp6 | 8.820236 | 0.1146659 |
| Tmem30b                          | 7.313221 | 0.115555  |
| Nipsnap1                         | 9.620997 | 0.1193293 |
| Appl2                            | 11.83265 | 0.1222695 |
| Nme1                             | 5.530678 | 0.1251235 |
| Nup133                           | 7.580897 | 0.1251711 |
| Gstk1                            | 6.221674 | 0.1310775 |
| Chordc1                          | 7.91338  | 0.1388539 |
| Urod                             | 7.407249 | 0.139651  |
| Polr2h                           | 6.994649 | 0.1426581 |

|                     |          |           |
|---------------------|----------|-----------|
| Ampd3               | 4.633488 | 0.1457707 |
| Atp13a1;mKIAA1825   | 6.417928 | 0.1461757 |
| Sfl                 | 1.602935 | 0.5915341 |
| Pck1                | 2.391162 | 0.5925296 |
| Tsfm                | 1.620645 | 0.5959858 |
| Col6a2              | 1.503381 | 0.6060193 |
| Igf2r               | 1.729995 | 0.6090123 |
| Gpx2                | 1.700633 | 0.611425  |
| Mecr                | 1.896193 | 0.6134405 |
| Rbm47               | 1.549361 | 0.6146954 |
| Gstm3               | 1.538837 | 0.6180931 |
| Col6a1              | 1.784359 | 0.6230088 |
| Spink3              | 2.474012 | 0.6255812 |
| Tgm3                | 19.08798 | 0.626719  |
| Mpst                | 1.669983 | 0.639736  |
| Shmt1               | 1.866149 | 0.6407636 |
| Cask                | 2.014518 | 0.6410246 |
| Hnrnpul1            | 1.627753 | 0.6414494 |
| Col6a3              | 1.730609 | 0.6423289 |
| Slc35a1             | 1.594572 | 0.6544504 |
| Hist1h1a            | 1.64432  | 0.6559914 |
| Wdr5                | 1.804426 | 0.6565489 |
| Snrpa;Gm5145        | 1.50128  | 0.6569925 |
| S100a4              | 0.503313 | 1.5052917 |
| Pnpt1               | 0.20776  | 1.5060356 |
| Lin7c;Lin7a;Lin7b   | 0.563822 | 2.4223489 |
| Memol               | 0.271506 | 2.4295216 |
| Pfdn2               | 0.424622 | 2.481574  |
| Hp                  | 0.081126 | 2.5128461 |
| Iigp1               | 0.065481 | 2.6665302 |
| Plekho2             | 0.63763  | 2.7141599 |
| I830012O16Rik;Ifit3 | 0.232232 | 2.8087042 |
| Gm9774;Adrm1        | 0.331646 | 2.8229017 |
| Gbp7                | 0.556613 | 2.8617359 |
| Erol1               | 0.401731 | 2.8714227 |
| Itih4               | 0.113786 | 3.01334   |
| Gm5409;Try10        | 0.630526 | 3.0759651 |
| Slc30a7             | 0.210145 | 3.2098382 |
| Dapk3               | 0.192062 | 3.3060101 |
| Zbp1                | 0.28538  | 3.3959743 |
| Arfgap2             | 0.420481 | 3.6097401 |
| Slc25a13            | 0.455439 | 3.6660802 |
| Irgm2               | 0.310557 | 3.6782105 |
| Rbpms               | 0.280345 | 3.6950605 |
| Lamtor2             | 0.238899 | 3.7580263 |

|                      |          |           |
|----------------------|----------|-----------|
| Fam175b              | 0.398746 | 3.8317728 |
| Ermp1                | 0.348175 | 3.8346551 |
| Tomm5                | 0.190668 | 3.8353272 |
| Mien1                | 5.79427  | 0.1492598 |
| Pfdn6                | 7.618564 | 0.1633185 |
| Zmpste24             | 4.744886 | 0.1691182 |
| Acap2                | 4.99563  | 0.1703112 |
| Gdpd1                | 5.719916 | 0.1721227 |
| Nov                  | 4.313418 | 0.1822831 |
| ppp2r5d;Ppp2r5d      | 2.792223 | 0.1839129 |
| Srrm2                | 13.01256 | 0.1872219 |
| Smarb1               | 5.988874 | 0.1918486 |
| Smpd3                | 5.195602 | 0.1945553 |
| Crem;Creb1;Atf1      | 5.10218  | 0.1952138 |
| Golga4               | 3.573001 | 0.2009272 |
| Ppih                 | 4.578904 | 0.2032176 |
| Eno2                 | 5.139475 | 0.20898   |
| Prkg1                | 6.568605 | 0.2135666 |
| Rer1                 | 3.945214 | 0.2199406 |
| Guk1                 | 3.949948 | 0.2243878 |
| Diap1;Diaph1         | 3.23004  | 0.2295227 |
| Fdx1                 | 3.981944 | 0.2305255 |
| Syvn1                | 4.605825 | 0.2463166 |
| Hdh2;Ier3ip1;Gm10784 | 4.289966 | 0.2508957 |
| Acp6                 | 3.935789 | 0.252399  |
| Nxn                  | 0.619652 | 1.5138601 |
| Apoe                 | 0.458718 | 1.5145429 |
| H2-Aa;H2Aa           | 0.643311 | 1.5228428 |
| Xdh                  | 0.636887 | 1.524294  |
| Dnajb4               | 0.60904  | 1.5520828 |
| Akap12               | 0.631731 | 1.5536648 |
| Otc                  | 0.479038 | 1.5554782 |
| Ctsc                 | 0.659034 | 1.5616909 |
| Cygb                 | 0.476858 | 1.5647894 |
| Fga                  | 0.280154 | 1.5716084 |
| Rcn3                 | 0.384647 | 1.5857596 |
| Pdlim4               | 0.638991 | 1.5926968 |
| Myl4                 | 0.426772 | 1.5939477 |
| Sgcd                 | 0.663236 | 1.5983873 |
| Rgs10                | 0.602163 | 1.6134949 |
| Cd74                 | 0.431172 | 1.6197015 |
| Ifi47                | 0.581694 | 1.6258448 |
| Msrb3                | 0.506005 | 1.6278573 |
| Mrpl22               | 0.425733 | 1.633299  |
| Dctn3                | 0.311692 | 1.6426629 |

|                          |          |           |
|--------------------------|----------|-----------|
| Stat1                    | 0.543597 | 1.6517753 |
| Grem1;Grem2              | 0.015707 | 1.6532322 |
| Sprr1a;Sprr1b            | 0.166096 | 3.852095  |
| Chil3;Chil4              | 0.472104 | 3.9363493 |
| COX17;Cox17              | 0.293507 | 4.0568662 |
| Rnasel                   | 0.549207 | 4.0944739 |
| Gyg;Gyg1                 | 0.210659 | 4.210312  |
| Prkaa2                   | 0.205549 | 4.213627  |
| 2210407C18Rik            | 0.249372 | 5.1096057 |
| Slc22a18                 | 0.134341 | 5.1685732 |
| S100a9                   | 0.018331 | 5.2720837 |
| Ppic                     | 0.211501 | 5.4128588 |
| Ngp                      | 0.093329 | 5.6287149 |
| Pgrmc1                   | 0.075104 | 5.6649991 |
| Atp6v1f                  | 0.259935 | 5.6934462 |
| Dhdh                     | 0.152263 | 5.7148632 |
| Gng12                    | 0.115481 | 5.8124815 |
| Lsm4                     | 0.149187 | 6.0742651 |
| Cds2                     | 0.287275 | 6.099192  |
| Atp6v0c                  | 0.538065 | 6.2238289 |
| Snrpf                    | 0.150678 | 6.2346431 |
| Chga                     | 0.091366 | 6.5935673 |
| Map11c3b;Gm5612;Map11c3a | 0.106318 | 6.7591803 |
| Serpina3n;Serpina3h      | 0.125741 | 7.2338035 |
| Itfg3                    | 4.417285 | 0.2556263 |
| Smad4                    | 3.338861 | 0.2684577 |
| Napg                     | 4.165715 | 0.2696658 |
| Ano10                    | 4.175322 | 0.2706794 |
| Ecm29;AI314180           | 3.892415 | 0.2742505 |
| Micu2                    | 3.013963 | 0.2769888 |
| Eif2b5                   | 4.740433 | 0.2825796 |
| Gm27029;Aarsd1           | 3.403016 | 0.2827462 |
| Srsf11;Sfrs11            | 3.221458 | 0.2871257 |
| Ublep1                   | 3.295124 | 0.2959272 |
| Coq6                     | 4.346012 | 0.2971176 |
| Golga3                   | 2.984441 | 0.3128163 |
| Akap8                    | 3.45124  | 0.3286033 |
| Slc4a7                   | 2.471463 | 0.3543822 |
| Ddx23                    | 2.751994 | 0.3574556 |
| Ttc37                    | 4.214825 | 0.365577  |
| Smarce1                  | 2.583148 | 0.3666323 |
| Tgtp1;Tgtp               | 1.830586 | 0.3818967 |
| Dhodh                    | 2.033087 | 0.4068602 |
| Rab4b                    | 0.476209 | 1.6548566 |
| Lrpap1                   | 0.571208 | 1.656429  |

|                               |          |           |
|-------------------------------|----------|-----------|
| Hcls1                         | 0.5819   | 1.6856123 |
| Colgalt1                      | 0.541504 | 1.6955885 |
| Fabp5                         | 0.233008 | 1.6993681 |
| H6pd                          | 0.60174  | 1.7041536 |
| Palm                          | 0.588206 | 1.7154625 |
| Lamp2                         | 0.584547 | 1.7480078 |
| Sirt2                         | 0.432794 | 1.7512534 |
| Gda                           | 0.393949 | 1.7656937 |
| Rab32                         | 0.49333  | 1.7713074 |
| Mgat4c                        | 0.426557 | 1.7756972 |
| Igfbp7                        | 0.472305 | 1.7826569 |
| Smad3;Smad9;Smad2;Smad5;Smad1 | 0.36354  | 1.7842058 |
| Gbp4                          | 0.576738 | 1.7865948 |
| Aip                           | 0.662414 | 1.8058711 |
| Impad1                        | 0.2501   | 1.8230431 |
| Fam136a                       | 0.543258 | 1.8248683 |
| Kdm1a                         | 0.462687 | 1.8314806 |
| Il1rn                         | 0.057197 | 7.848159  |
| Cpne1                         | 0.232573 | 8.0906478 |
| Cd68                          | 0.104238 | 8.1549723 |
| ND4;mt-Nd4;Mtnd4              | 0.166682 | 8.4054565 |
| Arl3                          | 0.617665 | 8.5875652 |
| Tmsb10                        | 0.046288 | 8.626712  |
| Fuca1                         | 0.332837 | 8.6895637 |
| Pea15;Pea15a                  | 0.108669 | 9.1486068 |
| Chp1                          | 0.115039 | 10.602032 |
| Snrpg                         | 0.078575 | 11.949124 |
| Mzb1                          | 0.137553 | 12.109698 |
| Lsm3                          | 0.063812 | 14.506484 |
| Copz1                         | 0.042332 | 15.585691 |
| Atp5j2                        | 0.036455 | 16.170401 |
| Rap2c;Rap2b;Rap2a             | 0.121698 | 18.488553 |
| Ube2d3;Ube2d2a;Ube2d2         | 0.611395 | 23.670113 |
| Cox7a2                        | 0.065773 | 33.388822 |
| mCG_6739;Rps21                | 0.02575  | 45.916403 |
| Macf1                         | 0.00438  | 114.2784  |

UC, ulcerative colitis; Evo, evidiamine; CTRL, control; FC, fold change.

Table SIII. Effect of Evo on inflammatory factors in the serum of mice with ulcerative colitis.

| Inflammatory factor (pg/ml) | CTRL             | 3% DSS                      |                               |                             |                             |
|-----------------------------|------------------|-----------------------------|-------------------------------|-----------------------------|-----------------------------|
|                             |                  | DSS only                    | SASP<br>(0.6g/kg)             | Evo (mg/kg)                 |                             |
|                             |                  |                             |                               | 10                          | 30                          |
| IL-1 $\beta$                | 54.6 $\pm$ 1.0   | 60.4 $\pm$ 2.2 <sup>a</sup> | 56.0 $\pm$ 1.4                | 54.1 $\pm$ 1.7 <sup>b</sup> | 51.4 $\pm$ 0.9 <sup>c</sup> |
| IL-2                        | 132.9 $\pm$ 2.1  | 137.1 $\pm$ 4.4             | 112.1 $\pm$ 3.6 <sup>b</sup>  | 140.6 $\pm$ 4.1             | 140.4 $\pm$ 3.1             |
| IL-6                        | 68.5 $\pm$ 1.4   | 66.7 $\pm$ 2.7              | 66.0 $\pm$ 1.0                | 66.0 $\pm$ 2.2              | 60.2 $\pm$ 0.6 <sup>b</sup> |
| IL-8                        | 84.2 $\pm$ 3.0   | 87.3 $\pm$ 2.0              | 82.1 $\pm$ 3.2                | 86.9 $\pm$ 2.1              | 79.9 $\pm$ 1.8 <sup>b</sup> |
| TNF- $\alpha$               | 145.3 $\pm$ 3.0  | 150.9 $\pm$ 6.9             | 127.3 $\pm$ 3.7 <sup>b</sup>  | 158.2 $\pm$ 9.6             | 140.8 $\pm$ 5.3             |
| IFN- $\gamma$               | 685.8 $\pm$ 29.5 | 713.2 $\pm$ 17.4            | 647.1 $\pm$ 19.6 <sup>b</sup> | 724.5 $\pm$ 34.0            | 675.0 $\pm$ 24.6            |

Data were analyzed using a one-way ANOVA and expressed as the mean  $\pm$  SEM (n=6). <sup>a</sup>P<0.05 vs. negative control mice; <sup>b</sup>P<0.05 and <sup>c</sup>P<0.01 vs. ulcerative colitis mice. DSS, dextran sodium sulfate; CTRL, control; Evo, Evodiamine; SASP, Sulfasalazine.
